# Supplementary material for: Prediction of Associations between OMIM Diseases and MicroRNAs by Random Walk on OMIM Disease Similarity Network
Source: ScientificWorldJournal. 2013 Mar 20;2013:204658. doi: 10.1155/2013/204658 (PMC3615631; doi:10.1155/2013/204658)
Supplement: Supplementary file 2 [file 204658.f2.txt]

load association
load omim_similarity

alpha=0.8;
[r,c]=size(association);
result=zeros(r,c);

bb=sum(omim_similarity);
for i=1:r  %normalization
    if(bb(1,i)~=0)
        w(:,i)=omim_similarity(:,i)/bb(1,i);
    else
        w(:,i)=zeros(r,1);
    end
end

for i=1:c  %random walk
    [num,nothing]=size(find(association(:,i)==1));
    p0=association(:,i)/sum(association(:,i)); 
    p1=p0;
    p=(1-alpha)*w*p0+alpha*p0;
    while(max(p-p1)>10^(-10))
        p1=p;
        p=(1-alpha)*w*p1+alpha*p0;
    end
    result(:,i)=p; 
end
