# Supplementary material for: Prediction of Associations between OMIM Diseases and MicroRNAs by Random Walk on OMIM Disease Similarity Network
Source: ScientificWorldJournal. 2013 Mar 20;2013:204658. doi: 10.1155/2013/204658 (PMC3615631; doi:10.1155/2013/204658)
Supplement: Supplementary file 3 [file 204658.f3.xlsx]

## Sheet: Sheet1
miRNA	OMIM ID	rank
hsa-let-7g	114480	1
hsa-let-7g	155720	2
hsa-let-7g	180200	3
hsa-let-7g	256700	4
hsa-let-7g	188470	5
hsa-let-7g	109800	6
hsa-let-7g	133239	7
hsa-let-7g	603956	8
hsa-let-7g	155255	9
hsa-let-7g	607174	10
hsa-let-7g	158350	11
hsa-let-7g	600807	12
hsa-let-7g	202300	13
hsa-let-7g	604370	14
hsa-let-7g	608232	15
hsa-let-7g	236000	16
hsa-let-7g	153600	17
hsa-let-7g	145500	18
hsa-let-7g	104300	19
hsa-let-7g	156240	20
hsa-let-7i	256700	1
hsa-let-7i	155720	2
hsa-let-7i	180200	3
hsa-let-7i	143100	4
hsa-let-7i	176807	5
hsa-let-7i	145500	6
hsa-let-7i	600807	7
hsa-let-7i	181500	8
hsa-let-7i	190685	9
hsa-let-7i	211980	10
hsa-let-7i	608232	11
hsa-let-7i	114550	12
hsa-let-7i	153600	13
hsa-let-7i	159552	14
hsa-let-7i	300100	15
hsa-let-7i	114500	16
hsa-let-7i	236000	17
hsa-let-7i	254500	18
hsa-let-7i	158350	19
hsa-let-7i	310200	20
hsa-miR-203	256700	1
hsa-miR-203	155720	2
hsa-miR-203	180200	3
hsa-miR-203	158350	4
hsa-miR-203	176807	5
hsa-miR-203	607174	6
hsa-miR-203	603956	7
hsa-miR-203	155255	8
hsa-miR-203	104300	9
hsa-miR-203	131440	10
hsa-miR-203	604370	11
hsa-miR-203	310200	12
hsa-miR-203	188470	13
hsa-miR-203	601665	14
hsa-miR-203	143100	15
hsa-miR-203	202300	16
hsa-miR-203	236000	17
hsa-miR-203	190685	18
hsa-miR-203	601400	19
hsa-miR-203	153600	20
hsa-miR-204	155720	1
hsa-miR-204	608232	2
hsa-miR-204	180200	3
hsa-miR-204	176807	4
hsa-miR-204	247640	5
hsa-miR-204	114500	6
hsa-miR-204	151400	7
hsa-miR-204	236000	8
hsa-miR-204	153600	9
hsa-miR-204	256700	10
hsa-miR-204	601400	11
hsa-miR-204	159552	12
hsa-miR-204	156240	13
hsa-miR-204	158350	14
hsa-miR-204	254500	15
hsa-miR-204	600807	16
hsa-miR-204	114550	17
hsa-miR-204	155255	18
hsa-miR-204	104300	19
hsa-miR-204	607174	20
hsa-miR-382	300376	1
hsa-miR-382	300100	2
hsa-miR-382	143100	3
hsa-miR-382	268000	4
hsa-miR-382	180200	5
hsa-miR-382	209850	6
hsa-miR-382	164400	7
hsa-miR-382	147421	8
hsa-miR-382	190685	9
hsa-miR-382	600274	10
hsa-miR-382	256700	11
hsa-miR-382	158350	12
hsa-miR-382	114480	13
hsa-miR-382	181500	14
hsa-miR-382	104300	15
hsa-miR-382	145500	16
hsa-miR-382	126200	17
hsa-miR-382	168600	18
hsa-miR-382	114550	19
hsa-miR-382	254500	20
hsa-miR-21	180200	1
hsa-miR-21	155720	2
hsa-miR-21	256700	3
hsa-miR-21	155255	4
hsa-miR-21	608232	5
hsa-miR-21	607174	6
hsa-miR-21	153600	7
hsa-miR-21	104300	8
hsa-miR-21	188470	9
hsa-miR-21	143100	10
hsa-miR-21	145500	11
hsa-miR-21	190685	12
hsa-miR-21	254500	13
hsa-miR-21	300100	14
hsa-miR-21	300376	15
hsa-miR-21	159552	16
hsa-miR-21	126200	17
hsa-miR-21	174050	18
hsa-miR-21	202300	19
hsa-miR-21	178600	20
hsa-miR-184	114480	1
hsa-miR-184	236000	2
hsa-miR-184	114500	3
hsa-miR-184	608232	4
hsa-miR-184	180200	5
hsa-miR-184	155720	6
hsa-miR-184	158350	7
hsa-miR-184	155255	8
hsa-miR-184	114550	9
hsa-miR-184	188470	10
hsa-miR-184	247640	11
hsa-miR-184	159552	12
hsa-miR-184	603956	13
hsa-miR-184	109800	14
hsa-miR-184	211980	15
hsa-miR-184	601400	16
hsa-miR-184	607174	17
hsa-miR-184	151400	18
hsa-miR-184	254500	19
hsa-miR-184	104300	20
hsa-miR-19a	180200	1
hsa-miR-19a	114480	2
hsa-miR-19a	256700	3
hsa-miR-19a	155720	4
hsa-miR-19a	133239	5
hsa-miR-19a	176807	6
hsa-miR-19a	607174	7
hsa-miR-19a	153600	8
hsa-miR-19a	188470	9
hsa-miR-19a	608232	10
hsa-miR-19a	236000	11
hsa-miR-19a	104300	12
hsa-miR-19a	151400	13
hsa-miR-19a	109800	14
hsa-miR-19a	600807	15
hsa-miR-19a	143100	16
hsa-miR-19a	603956	17
hsa-miR-19a	145500	18
hsa-miR-19a	604370	19
hsa-miR-19a	300100	20
hsa-miR-24	114480	1
hsa-miR-24	608232	2
hsa-miR-24	155720	3
hsa-miR-24	104300	4
hsa-miR-24	180200	5
hsa-miR-24	153600	6
hsa-miR-24	607174	7
hsa-miR-24	236000	8
hsa-miR-24	159552	9
hsa-miR-24	158350	10
hsa-miR-24	151400	11
hsa-miR-24	114500	12
hsa-miR-24	256700	13
hsa-miR-24	190685	14
hsa-miR-24	601400	15
hsa-miR-24	143100	16
hsa-miR-24	604370	17
hsa-miR-24	155255	18
hsa-miR-24	211980	19
hsa-miR-24	254500	20
hsa-miR-302c	603956	1
hsa-miR-302c	176807	2
hsa-miR-302c	114500	3
hsa-miR-302c	114480	4
hsa-miR-302c	604183	5
hsa-miR-302c	155255	6
hsa-miR-302c	133239	7
hsa-miR-302c	180200	8
hsa-miR-302c	114550	9
hsa-miR-302c	608232	10
hsa-miR-302c	109800	11
hsa-miR-302c	158350	12
hsa-miR-302c	159552	13
hsa-miR-302c	202300	14
hsa-miR-302c	601626	15
hsa-miR-302c	113970	16
hsa-miR-302c	300228	17
hsa-miR-302c	155720	18
hsa-miR-302c	236000	19
hsa-miR-302c	153600	20
hsa-miR-368	300376	1
hsa-miR-368	180200	2
hsa-miR-368	300100	3
hsa-miR-368	114480	4
hsa-miR-368	143100	5
hsa-miR-368	268000	6
hsa-miR-368	158350	7
hsa-miR-368	190685	8
hsa-miR-368	176807	9
hsa-miR-368	256700	10
hsa-miR-368	114550	11
hsa-miR-368	164400	12
hsa-miR-368	209850	13
hsa-miR-368	114500	14
hsa-miR-368	104300	15
hsa-miR-368	126200	16
hsa-miR-368	600274	17
hsa-miR-368	147421	18
hsa-miR-368	608232	19
hsa-miR-368	603956	20
hsa-miR-150	114500	1
hsa-miR-150	114480	2
hsa-miR-150	176807	3
hsa-miR-150	155720	4
hsa-miR-150	180200	5
hsa-miR-150	608232	6
hsa-miR-150	603956	7
hsa-miR-150	256700	8
hsa-miR-150	607174	9
hsa-miR-150	158350	10
hsa-miR-150	174050	11
hsa-miR-150	109800	12
hsa-miR-150	601400	13
hsa-miR-150	601626	14
hsa-miR-150	155255	15
hsa-miR-150	254500	16
hsa-miR-150	236000	17
hsa-miR-150	159552	18
hsa-miR-150	600807	19
hsa-miR-150	153600	20
hsa-miR-125a	180200	1
hsa-miR-125a	155720	2
hsa-miR-125a	607174	3
hsa-miR-125a	158350	4
hsa-miR-125a	603956	5
hsa-miR-125a	608232	6
hsa-miR-125a	109800	7
hsa-miR-125a	601400	8
hsa-miR-125a	133239	9
hsa-miR-125a	153600	10
hsa-miR-125a	188470	11
hsa-miR-125a	236000	12
hsa-miR-125a	104300	13
hsa-miR-125a	156240	14
hsa-miR-125a	143100	15
hsa-miR-125a	151400	16
hsa-miR-125a	202300	17
hsa-miR-125a	174050	18
hsa-miR-125a	150699	19
hsa-miR-125a	159552	20
hsa-miR-146a	155720	1
hsa-miR-146a	180200	2
hsa-miR-146a	114500	3
hsa-miR-146a	608232	4
hsa-miR-146a	256700	5
hsa-miR-146a	158350	6
hsa-miR-146a	254500	7
hsa-miR-146a	601400	8
hsa-miR-146a	607174	9
hsa-miR-146a	236000	10
hsa-miR-146a	153600	11
hsa-miR-146a	143100	12
hsa-miR-146a	600807	13
hsa-miR-146a	145500	14
hsa-miR-146a	155255	15
hsa-miR-146a	188470	16
hsa-miR-146a	109800	17
hsa-miR-146a	604370	18
hsa-miR-146a	181500	19
hsa-miR-146a	159552	20
hsa-miR-146b	180200	1
hsa-miR-146b	143100	2
hsa-miR-146b	300100	3
hsa-miR-146b	256700	4
hsa-miR-146b	104300	5
hsa-miR-146b	181500	6
hsa-miR-146b	114550	7
hsa-miR-146b	164400	8
hsa-miR-146b	190685	9
hsa-miR-146b	155720	10
hsa-miR-146b	145500	11
hsa-miR-146b	268000	12
hsa-miR-146b	158350	13
hsa-miR-146b	607174	14
hsa-miR-146b	176807	15
hsa-miR-146b	600274	16
hsa-miR-146b	114500	17
hsa-miR-146b	254500	18
hsa-miR-146b	126200	19
hsa-miR-146b	155255	20
hsa-let-7d	114500	1
hsa-let-7d	155720	2
hsa-let-7d	180200	3
hsa-let-7d	256700	4
hsa-let-7d	603956	5
hsa-let-7d	155255	6
hsa-let-7d	188470	7
hsa-let-7d	158350	8
hsa-let-7d	607174	9
hsa-let-7d	109800	10
hsa-let-7d	608232	11
hsa-let-7d	133239	12
hsa-let-7d	236000	13
hsa-let-7d	202300	14
hsa-let-7d	153600	15
hsa-let-7d	104300	16
hsa-let-7d	300228	17
hsa-let-7d	600807	18
hsa-let-7d	145500	19
hsa-let-7d	174050	20
hsa-let-7e	153600	1
hsa-let-7e	114480	2
hsa-let-7e	608232	3
hsa-let-7e	155720	4
hsa-let-7e	236000	5
hsa-let-7e	151400	6
hsa-let-7e	159552	7
hsa-let-7e	256700	8
hsa-let-7e	114500	9
hsa-let-7e	104300	10
hsa-let-7e	176807	11
hsa-let-7e	607174	12
hsa-let-7e	600807	13
hsa-let-7e	155255	14
hsa-let-7e	158350	15
hsa-let-7e	188470	16
hsa-let-7e	113970	17
hsa-let-7e	156240	18
hsa-let-7e	143100	19
hsa-let-7e	126200	20
hsa-let-7f	155720	1
hsa-let-7f	114500	2
hsa-let-7f	180200	3
hsa-let-7f	256700	4
hsa-let-7f	114550	5
hsa-let-7f	158350	6
hsa-let-7f	607174	7
hsa-let-7f	601400	8
hsa-let-7f	156240	9
hsa-let-7f	300228	10
hsa-let-7f	603956	11
hsa-let-7f	188470	12
hsa-let-7f	155255	13
hsa-let-7f	604370	14
hsa-let-7f	109800	15
hsa-let-7f	608232	16
hsa-let-7f	236000	17
hsa-let-7f	202300	18
hsa-let-7f	143100	19
hsa-let-7f	153600	20
hsa-miR-125b	114500	1
hsa-miR-125b	155720	2
hsa-miR-125b	603956	3
hsa-miR-125b	180200	4
hsa-miR-125b	607174	5
hsa-miR-125b	158350	6
hsa-miR-125b	174050	7
hsa-miR-125b	143100	8
hsa-miR-125b	604370	9
hsa-miR-125b	310200	10
hsa-miR-125b	300100	11
hsa-miR-125b	211980	12
hsa-miR-125b	190685	13
hsa-miR-125b	145500	14
hsa-miR-125b	188470	15
hsa-miR-125b	601400	16
hsa-miR-125b	300228	17
hsa-miR-125b	608232	18
hsa-miR-125b	133239	19
hsa-miR-125b	202300	20
hsa-miR-135b	603956	1
hsa-miR-135b	109800	2
hsa-miR-135b	133239	3
hsa-miR-135b	180200	4
hsa-miR-135b	256700	5
hsa-miR-135b	155255	6
hsa-miR-135b	114480	7
hsa-miR-135b	607174	8
hsa-miR-135b	155720	9
hsa-miR-135b	211980	10
hsa-miR-135b	604370	11
hsa-miR-135b	158350	12
hsa-miR-135b	176807	13
hsa-miR-135b	114550	14
hsa-miR-135b	188470	15
hsa-miR-135b	150699	16
hsa-miR-135b	604183	17
hsa-miR-135b	310200	18
hsa-miR-135b	608232	19
hsa-miR-135b	601400	20
hsa-miR-151	114480	1
hsa-miR-151	151400	2
hsa-miR-151	608232	3
hsa-miR-151	188470	4
hsa-miR-151	254500	5
hsa-miR-151	155720	6
hsa-miR-151	158350	7
hsa-miR-151	202300	8
hsa-miR-151	604370	9
hsa-miR-151	180200	10
hsa-miR-151	603956	11
hsa-miR-151	109800	12
hsa-miR-151	236000	13
hsa-miR-151	607174	14
hsa-miR-151	114500	15
hsa-miR-151	211980	16
hsa-miR-151	104300	17
hsa-miR-151	601400	18
hsa-miR-151	247640	19
hsa-miR-151	159552	20
hsa-miR-151*	608232	1
hsa-miR-151*	159552	2
hsa-miR-151*	153600	3
hsa-miR-151*	151400	4
hsa-miR-151*	236000	5
hsa-miR-151*	131440	6
hsa-miR-151*	155720	7
hsa-miR-151*	113970	8
hsa-miR-151*	114480	9
hsa-miR-151*	254500	10
hsa-miR-151*	180200	11
hsa-miR-151*	104300	12
hsa-miR-151*	607174	13
hsa-miR-151*	604370	14
hsa-miR-151*	158350	15
hsa-miR-151*	211980	16
hsa-miR-151*	176807	17
hsa-miR-151*	126200	18
hsa-miR-151*	156240	19
hsa-miR-151*	263300	20
hsa-miR-152	176807	1
hsa-miR-152	155720	2
hsa-miR-152	114500	3
hsa-miR-152	180200	4
hsa-miR-152	256700	5
hsa-miR-152	608232	6
hsa-miR-152	603956	7
hsa-miR-152	104300	8
hsa-miR-152	158350	9
hsa-miR-152	211980	10
hsa-miR-152	601400	11
hsa-miR-152	109800	12
hsa-miR-152	236000	13
hsa-miR-152	174050	14
hsa-miR-152	607174	15
hsa-miR-152	155255	16
hsa-miR-152	159552	17
hsa-miR-152	145500	18
hsa-miR-152	310200	19
hsa-miR-152	126200	20
hsa-miR-133a	180200	1
hsa-miR-133a	155720	2
hsa-miR-133a	256700	3
hsa-miR-133a	114480	4
hsa-miR-133a	176807	5
hsa-miR-133a	603956	6
hsa-miR-133a	607174	7
hsa-miR-133a	608232	8
hsa-miR-133a	155255	9
hsa-miR-133a	153600	10
hsa-miR-133a	133239	11
hsa-miR-133a	188470	12
hsa-miR-133a	104300	13
hsa-miR-133a	158350	14
hsa-miR-133a	159552	15
hsa-miR-133a	236000	16
hsa-miR-133a	600807	17
hsa-miR-133a	310200	18
hsa-miR-133a	190685	19
hsa-miR-133a	211980	20
hsa-miR-133b	114480	1
hsa-miR-133b	180200	2
hsa-miR-133b	603956	3
hsa-miR-133b	176807	4
hsa-miR-133b	155720	5
hsa-miR-133b	256700	6
hsa-miR-133b	114550	7
hsa-miR-133b	607174	8
hsa-miR-133b	158350	9
hsa-miR-133b	143100	10
hsa-miR-133b	155255	11
hsa-miR-133b	188470	12
hsa-miR-133b	104300	13
hsa-miR-133b	202300	14
hsa-miR-133b	150699	15
hsa-miR-133b	604370	16
hsa-miR-133b	156240	17
hsa-miR-133b	310200	18
hsa-miR-133b	300100	19
hsa-miR-133b	133239	20
hsa-miR-134	300376	1
hsa-miR-134	180200	2
hsa-miR-134	300100	3
hsa-miR-134	114480	4
hsa-miR-134	143100	5
hsa-miR-134	268000	6
hsa-miR-134	158350	7
hsa-miR-134	190685	8
hsa-miR-134	176807	9
hsa-miR-134	256700	10
hsa-miR-134	114550	11
hsa-miR-134	164400	12
hsa-miR-134	209850	13
hsa-miR-134	114500	14
hsa-miR-134	104300	15
hsa-miR-134	126200	16
hsa-miR-134	600274	17
hsa-miR-134	147421	18
hsa-miR-134	608232	19
hsa-miR-134	603956	20
hsa-miR-136	176807	1
hsa-miR-136	155720	2
hsa-miR-136	256700	3
hsa-miR-136	180200	4
hsa-miR-136	114500	5
hsa-miR-136	607174	6
hsa-miR-136	158350	7
hsa-miR-136	211980	8
hsa-miR-136	109800	9
hsa-miR-136	174050	10
hsa-miR-136	603956	11
hsa-miR-136	608232	12
hsa-miR-136	145500	13
hsa-miR-136	104300	14
hsa-miR-136	300228	15
hsa-miR-136	150699	16
hsa-miR-136	310200	17
hsa-miR-136	604370	18
hsa-miR-136	601400	19
hsa-miR-136	155255	20
hsa-miR-210	180200	1
hsa-miR-210	155720	2
hsa-miR-210	608232	3
hsa-miR-210	256700	4
hsa-miR-210	143100	5
hsa-miR-210	153600	6
hsa-miR-210	158350	7
hsa-miR-210	236000	8
hsa-miR-210	607174	9
hsa-miR-210	114500	10
hsa-miR-210	114550	11
hsa-miR-210	151400	12
hsa-miR-210	159552	13
hsa-miR-210	300100	14
hsa-miR-210	190685	15
hsa-miR-210	254500	16
hsa-miR-210	300376	17
hsa-miR-210	155255	18
hsa-miR-210	188470	19
hsa-miR-210	600807	20
hsa-miR-9	180200	1
hsa-miR-9	114480	2
hsa-miR-9	155720	3
hsa-miR-9	114500	4
hsa-miR-9	607174	5
hsa-miR-9	153600	6
hsa-miR-9	176807	7
hsa-miR-9	608232	8
hsa-miR-9	158350	9
hsa-miR-9	133239	10
hsa-miR-9	601400	11
hsa-miR-9	190685	12
hsa-miR-9	126200	13
hsa-miR-9	188470	14
hsa-miR-9	254500	15
hsa-miR-9	109800	16
hsa-miR-9	300100	17
hsa-miR-9	600807	18
hsa-miR-9	181500	19
hsa-miR-9	603956	20
hsa-miR-369-5p	300376	1
hsa-miR-369-5p	300100	2
hsa-miR-369-5p	180200	3
hsa-miR-369-5p	143100	4
hsa-miR-369-5p	268000	5
hsa-miR-369-5p	253600	6
hsa-miR-369-5p	256700	7
hsa-miR-369-5p	114480	8
hsa-miR-369-5p	209850	9
hsa-miR-369-5p	190685	10
hsa-miR-369-5p	164400	11
hsa-miR-369-5p	145500	12
hsa-miR-369-5p	104300	13
hsa-miR-369-5p	181500	14
hsa-miR-369-5p	158350	15
hsa-miR-369-5p	126200	16
hsa-miR-369-5p	153600	17
hsa-miR-369-5p	254500	18
hsa-miR-369-5p	114500	19
hsa-miR-369-5p	147421	20
hsa-miR-370	114480	1
hsa-miR-370	603956	2
hsa-miR-370	300228	3
hsa-miR-370	158350	4
hsa-miR-370	114550	5
hsa-miR-370	604370	6
hsa-miR-370	155720	7
hsa-miR-370	607174	8
hsa-miR-370	114500	9
hsa-miR-370	109800	10
hsa-miR-370	180200	11
hsa-miR-370	256700	12
hsa-miR-370	188470	13
hsa-miR-370	211980	14
hsa-miR-370	202300	15
hsa-miR-370	155255	16
hsa-miR-370	150699	17
hsa-miR-370	601400	18
hsa-miR-370	143100	19
hsa-miR-370	104300	20
hsa-miR-371	176807	1
hsa-miR-371	114480	2
hsa-miR-371	603956	3
hsa-miR-371	150699	4
hsa-miR-371	607174	5
hsa-miR-371	180200	6
hsa-miR-371	604370	7
hsa-miR-371	158350	8
hsa-miR-371	202300	9
hsa-miR-371	114550	10
hsa-miR-371	114500	11
hsa-miR-371	109800	12
hsa-miR-371	155720	13
hsa-miR-371	161550	14
hsa-miR-371	310200	15
hsa-miR-371	256700	16
hsa-miR-371	604183	17
hsa-miR-371	209850	18
hsa-miR-371	300100	19
hsa-miR-371	188470	20
hsa-miR-372	176807	1
hsa-miR-372	114480	2
hsa-miR-372	180200	3
hsa-miR-372	608232	4
hsa-miR-372	603956	5
hsa-miR-372	604370	6
hsa-miR-372	607174	7
hsa-miR-372	155720	8
hsa-miR-372	158350	9
hsa-miR-372	151400	10
hsa-miR-372	159552	11
hsa-miR-372	247640	12
hsa-miR-372	109800	13
hsa-miR-372	155255	14
hsa-miR-372	114550	15
hsa-miR-372	256700	16
hsa-miR-372	211980	17
hsa-miR-372	150699	18
hsa-miR-372	202300	19
hsa-miR-372	188470	20
hsa-miR-373	176807	1
hsa-miR-373	114500	2
hsa-miR-373	155255	3
hsa-miR-373	180200	4
hsa-miR-373	114550	5
hsa-miR-373	256700	6
hsa-miR-373	155720	7
hsa-miR-373	211980	8
hsa-miR-373	603956	9
hsa-miR-373	158350	10
hsa-miR-373	188470	11
hsa-miR-373	202300	12
hsa-miR-373	604370	13
hsa-miR-373	607174	14
hsa-miR-373	608232	15
hsa-miR-373	604183	16
hsa-miR-373	109800	17
hsa-miR-373	145500	18
hsa-miR-373	310200	19
hsa-miR-373	153600	20
hsa-miR-182	180200	1
hsa-miR-182	155720	2
hsa-miR-182	256700	3
hsa-miR-182	158350	4
hsa-miR-182	608232	5
hsa-miR-182	155255	6
hsa-miR-182	607174	7
hsa-miR-182	603956	8
hsa-miR-182	153600	9
hsa-miR-182	109800	10
hsa-miR-182	104300	11
hsa-miR-182	188470	12
hsa-miR-182	133239	13
hsa-miR-182	236000	14
hsa-miR-182	601400	15
hsa-miR-182	310200	16
hsa-miR-182	151400	17
hsa-miR-182	143100	18
hsa-miR-182	247640	19
hsa-miR-182	202300	20
hsa-miR-182*	114480	1
hsa-miR-182*	155720	2
hsa-miR-182*	114500	3
hsa-miR-182*	180200	4
hsa-miR-182*	256700	5
hsa-miR-182*	109800	6
hsa-miR-182*	188470	7
hsa-miR-182*	601400	8
hsa-miR-182*	607174	9
hsa-miR-182*	603956	10
hsa-miR-182*	158350	11
hsa-miR-182*	202300	12
hsa-miR-182*	155255	13
hsa-miR-182*	156240	14
hsa-miR-182*	604370	15
hsa-miR-182*	608232	16
hsa-miR-182*	236000	17
hsa-miR-182*	300228	18
hsa-miR-182*	600807	19
hsa-miR-182*	133239	20
hsa-miR-183	114480	1
hsa-miR-183	180200	2
hsa-miR-183	155720	3
hsa-miR-183	256700	4
hsa-miR-183	607174	5
hsa-miR-183	158350	6
hsa-miR-183	155255	7
hsa-miR-183	109800	8
hsa-miR-183	188470	9
hsa-miR-183	603956	10
hsa-miR-183	133239	11
hsa-miR-183	300100	12
hsa-miR-183	153600	13
hsa-miR-183	310200	14
hsa-miR-183	143100	15
hsa-miR-183	601400	16
hsa-miR-183	604370	17
hsa-miR-183	104300	18
hsa-miR-183	608232	19
hsa-miR-183	202300	20
hsa-miR-20a	155720	1
hsa-miR-20a	180200	2
hsa-miR-20a	256700	3
hsa-miR-20a	158350	4
hsa-miR-20a	607174	5
hsa-miR-20a	603956	6
hsa-miR-20a	153600	7
hsa-miR-20a	601400	8
hsa-miR-20a	604370	9
hsa-miR-20a	109800	10
hsa-miR-20a	133239	11
hsa-miR-20a	188470	12
hsa-miR-20a	104300	13
hsa-miR-20a	151400	14
hsa-miR-20a	254500	15
hsa-miR-20a	600807	16
hsa-miR-20a	174050	17
hsa-miR-20a	310200	18
hsa-miR-20a	143100	19
hsa-miR-20a	145500	20
hsa-miR-218	114480	1
hsa-miR-218	114500	2
hsa-miR-218	109800	3
hsa-miR-218	114550	4
hsa-miR-218	155720	5
hsa-miR-218	604370	6
hsa-miR-218	180200	7
hsa-miR-218	256700	8
hsa-miR-218	188470	9
hsa-miR-218	158350	10
hsa-miR-218	300228	11
hsa-miR-218	155255	12
hsa-miR-218	202300	13
hsa-miR-218	607174	14
hsa-miR-218	601400	15
hsa-miR-218	150699	16
hsa-miR-218	133239	17
hsa-miR-218	156240	18
hsa-miR-218	608232	19
hsa-miR-218	236000	20
hsa-miR-22	155720	1
hsa-miR-22	180200	2
hsa-miR-22	608232	3
hsa-miR-22	153600	4
hsa-miR-22	256700	5
hsa-miR-22	236000	6
hsa-miR-22	114500	7
hsa-miR-22	159552	8
hsa-miR-22	158350	9
hsa-miR-22	143100	10
hsa-miR-22	607174	11
hsa-miR-22	151400	12
hsa-miR-22	114550	13
hsa-miR-22	254500	14
hsa-miR-22	600807	15
hsa-miR-22	155255	16
hsa-miR-22	188470	17
hsa-miR-22	190685	18
hsa-miR-22	145500	19
hsa-miR-22	300100	20
hsa-miR-221	180200	1
hsa-miR-221	155720	2
hsa-miR-221	104300	3
hsa-miR-221	145500	4
hsa-miR-221	608232	5
hsa-miR-221	607174	6
hsa-miR-221	300100	7
hsa-miR-221	143100	8
hsa-miR-221	158350	9
hsa-miR-221	254500	10
hsa-miR-221	190685	11
hsa-miR-221	153600	12
hsa-miR-221	155255	13
hsa-miR-221	181500	14
hsa-miR-221	174050	15
hsa-miR-221	159552	16
hsa-miR-221	126200	17
hsa-miR-221	236000	18
hsa-miR-221	603956	19
hsa-miR-221	188470	20
hsa-miR-222	180200	1
hsa-miR-222	155720	2
hsa-miR-222	256700	3
hsa-miR-222	104300	4
hsa-miR-222	300376	5
hsa-miR-222	145500	6
hsa-miR-222	158350	7
hsa-miR-222	143100	8
hsa-miR-222	607174	9
hsa-miR-222	300100	10
hsa-miR-222	608232	11
hsa-miR-222	114500	12
hsa-miR-222	190685	13
hsa-miR-222	603956	14
hsa-miR-222	174050	15
hsa-miR-222	604370	16
hsa-miR-222	254500	17
hsa-miR-222	153600	18
hsa-miR-222	155255	19
hsa-miR-222	126200	20
hsa-miR-223	180200	1
hsa-miR-223	114480	2
hsa-miR-223	155720	3
hsa-miR-223	256700	4
hsa-miR-223	158350	5
hsa-miR-223	607174	6
hsa-miR-223	104300	7
hsa-miR-223	310200	8
hsa-miR-223	603956	9
hsa-miR-223	155255	10
hsa-miR-223	143100	11
hsa-miR-223	300100	12
hsa-miR-223	159552	13
hsa-miR-223	236000	14
hsa-miR-223	254500	15
hsa-miR-223	153600	16
hsa-miR-223	604370	17
hsa-miR-223	190685	18
hsa-miR-223	601400	19
hsa-miR-223	188470	20
hsa-miR-27a	155720	1
hsa-miR-27a	180200	2
hsa-miR-27a	158350	3
hsa-miR-27a	607174	4
hsa-miR-27a	256700	5
hsa-miR-27a	608232	6
hsa-miR-27a	603956	7
hsa-miR-27a	109800	8
hsa-miR-27a	604370	9
hsa-miR-27a	211980	10
hsa-miR-27a	104300	11
hsa-miR-27a	155255	12
hsa-miR-27a	310200	13
hsa-miR-27a	153600	14
hsa-miR-27a	300228	15
hsa-miR-27a	143100	16
hsa-miR-27a	236000	17
hsa-miR-27a	190685	18
hsa-miR-27a	151400	19
hsa-miR-27a	601400	20
hsa-miR-29a	180200	1
hsa-miR-29a	114480	2
hsa-miR-29a	155720	3
hsa-miR-29a	300100	4
hsa-miR-29a	190685	5
hsa-miR-29a	607174	6
hsa-miR-29a	158350	7
hsa-miR-29a	114550	8
hsa-miR-29a	155255	9
hsa-miR-29a	145500	10
hsa-miR-29a	601400	11
hsa-miR-29a	608232	12
hsa-miR-29a	126200	13
hsa-miR-29a	153600	14
hsa-miR-29a	300376	15
hsa-miR-29a	164400	16
hsa-miR-29a	600807	17
hsa-miR-29a	209850	18
hsa-miR-29a	174050	19
hsa-miR-29a	600274	20
hsa-miR-29b	180200	1
hsa-miR-29b	155720	2
hsa-miR-29b	608232	3
hsa-miR-29b	158350	4
hsa-miR-29b	114550	5
hsa-miR-29b	143100	6
hsa-miR-29b	607174	7
hsa-miR-29b	104300	8
hsa-miR-29b	300100	9
hsa-miR-29b	190685	10
hsa-miR-29b	254500	11
hsa-miR-29b	153600	12
hsa-miR-29b	300376	13
hsa-miR-29b	145500	14
hsa-miR-29b	159552	15
hsa-miR-29b	236000	16
hsa-miR-29b	600807	17
hsa-miR-29b	155255	18
hsa-miR-29b	109800	19
hsa-miR-29b	126200	20
hsa-miR-375	114500	1
hsa-miR-375	155255	2
hsa-miR-375	114480	3
hsa-miR-375	188470	4
hsa-miR-375	114550	5
hsa-miR-375	211980	6
hsa-miR-375	180200	7
hsa-miR-375	155720	8
hsa-miR-375	603956	9
hsa-miR-375	604370	10
hsa-miR-375	256700	11
hsa-miR-375	202300	12
hsa-miR-375	158350	13
hsa-miR-375	109800	14
hsa-miR-375	608232	15
hsa-miR-375	607174	16
hsa-miR-375	604183	17
hsa-miR-375	153600	18
hsa-miR-375	236000	19
hsa-miR-375	600807	20
hsa-miR-423	114480	1
hsa-miR-423	180200	2
hsa-miR-423	155720	3
hsa-miR-423	256700	4
hsa-miR-423	114500	5
hsa-miR-423	607174	6
hsa-miR-423	143100	7
hsa-miR-423	114550	8
hsa-miR-423	153600	9
hsa-miR-423	155255	10
hsa-miR-423	158350	11
hsa-miR-423	178600	12
hsa-miR-423	300376	13
hsa-miR-423	176807	14
hsa-miR-423	247640	15
hsa-miR-423	209850	16
hsa-miR-423	600807	17
hsa-miR-423	601400	18
hsa-miR-423	188470	19
hsa-miR-423	236000	20
hsa-miR-424	608232	1
hsa-miR-424	159552	2
hsa-miR-424	153600	3
hsa-miR-424	236000	4
hsa-miR-424	254500	5
hsa-miR-424	114480	6
hsa-miR-424	180200	7
hsa-miR-424	211980	8
hsa-miR-424	176807	9
hsa-miR-424	155720	10
hsa-miR-424	114500	11
hsa-miR-424	113970	12
hsa-miR-424	607174	13
hsa-miR-424	131440	14
hsa-miR-424	604370	15
hsa-miR-424	158350	16
hsa-miR-424	256700	17
hsa-miR-424	600807	18
hsa-miR-424	104300	19
hsa-miR-424	188470	20
hsa-miR-425-5p	114480	1
hsa-miR-425-5p	156240	2
hsa-miR-425-5p	114500	3
hsa-miR-425-5p	155720	4
hsa-miR-425-5p	601400	5
hsa-miR-425-5p	180200	6
hsa-miR-425-5p	188470	7
hsa-miR-425-5p	256700	8
hsa-miR-425-5p	114550	9
hsa-miR-425-5p	176807	10
hsa-miR-425-5p	236000	11
hsa-miR-425-5p	178600	12
hsa-miR-425-5p	153600	13
hsa-miR-425-5p	202300	14
hsa-miR-425-5p	155255	15
hsa-miR-425-5p	600807	16
hsa-miR-425-5p	151400	17
hsa-miR-425-5p	133239	18
hsa-miR-425-5p	607174	19
hsa-miR-425-5p	608232	20
hsa-miR-451	155720	1
hsa-miR-451	180200	2
hsa-miR-451	176807	3
hsa-miR-451	608232	4
hsa-miR-451	256700	5
hsa-miR-451	607174	6
hsa-miR-451	158350	7
hsa-miR-451	153600	8
hsa-miR-451	236000	9
hsa-miR-451	114550	10
hsa-miR-451	151400	11
hsa-miR-451	603956	12
hsa-miR-451	604370	13
hsa-miR-451	109800	14
hsa-miR-451	156240	15
hsa-miR-451	159552	16
hsa-miR-451	155255	17
hsa-miR-451	601400	18
hsa-miR-451	188470	19
hsa-miR-451	254500	20
hsa-miR-497	155720	1
hsa-miR-497	180200	2
hsa-miR-497	256700	3
hsa-miR-497	114550	4
hsa-miR-497	158350	5
hsa-miR-497	607174	6
hsa-miR-497	603956	7
hsa-miR-497	109800	8
hsa-miR-497	155255	9
hsa-miR-497	604370	10
hsa-miR-497	188470	11
hsa-miR-497	601400	12
hsa-miR-497	156240	13
hsa-miR-497	133239	14
hsa-miR-497	300228	15
hsa-miR-497	608232	16
hsa-miR-497	202300	17
hsa-miR-497	236000	18
hsa-miR-497	143100	19
hsa-miR-497	153600	20
hsa-miR-511	188470	1
hsa-miR-511	114480	2
hsa-miR-511	114500	3
hsa-miR-511	114550	4
hsa-miR-511	176807	5
hsa-miR-511	601400	6
hsa-miR-511	155720	7
hsa-miR-511	180200	8
hsa-miR-511	156240	9
hsa-miR-511	155255	10
hsa-miR-511	133239	11
hsa-miR-511	256700	12
hsa-miR-511	236000	13
hsa-miR-511	153600	14
hsa-miR-511	143100	15
hsa-miR-511	608232	16
hsa-miR-511	109800	17
hsa-miR-511	158350	18
hsa-miR-511	190685	19
hsa-miR-511	161550	20
hsa-miR-599	300100	1
hsa-miR-599	104300	2
hsa-miR-599	164400	3
hsa-miR-599	143100	4
hsa-miR-599	256700	5
hsa-miR-599	600807	6
hsa-miR-599	310200	7
hsa-miR-599	254500	8
hsa-miR-599	153600	9
hsa-miR-599	268000	10
hsa-miR-599	181500	11
hsa-miR-599	180200	12
hsa-miR-599	159552	13
hsa-miR-599	608232	14
hsa-miR-599	155720	15
hsa-miR-599	600274	16
hsa-miR-599	190685	17
hsa-miR-599	151400	18
hsa-miR-599	236000	19
hsa-miR-599	145500	20
hsa-miR-661	176807	1
hsa-miR-661	155720	2
hsa-miR-661	256700	3
hsa-miR-661	180200	4
hsa-miR-661	158350	5
hsa-miR-661	211980	6
hsa-miR-661	114500	7
hsa-miR-661	607174	8
hsa-miR-661	300228	9
hsa-miR-661	114550	10
hsa-miR-661	310200	11
hsa-miR-661	143100	12
hsa-miR-661	608232	13
hsa-miR-661	601665	14
hsa-miR-661	145500	15
hsa-miR-661	604370	16
hsa-miR-661	603956	17
hsa-miR-661	156240	18
hsa-miR-661	174050	19
hsa-miR-661	247640	20
hsa-miR-7	180200	1
hsa-miR-7	143100	2
hsa-miR-7	104300	3
hsa-miR-7	256700	4
hsa-miR-7	155720	5
hsa-miR-7	114550	6
hsa-miR-7	114500	7
hsa-miR-7	607174	8
hsa-miR-7	176807	9
hsa-miR-7	190685	10
hsa-miR-7	300100	11
hsa-miR-7	310200	12
hsa-miR-7	164400	13
hsa-miR-7	158350	14
hsa-miR-7	153600	15
hsa-miR-7	145500	16
hsa-miR-7	155255	17
hsa-miR-7	300376	18
hsa-miR-7	600274	19
hsa-miR-7	188470	20
hsa-miR-107	180200	1
hsa-miR-107	155255	2
hsa-miR-107	608232	3
hsa-miR-107	256700	4
hsa-miR-107	114480	5
hsa-miR-107	190685	6
hsa-miR-107	601400	7
hsa-miR-107	143100	8
hsa-miR-107	155720	9
hsa-miR-107	254500	10
hsa-miR-107	158350	11
hsa-miR-107	300100	12
hsa-miR-107	176807	13
hsa-miR-107	607174	14
hsa-miR-107	145500	15
hsa-miR-107	153600	16
hsa-miR-107	236000	17
hsa-miR-107	188470	18
hsa-miR-107	159552	19
hsa-miR-107	310200	20
hsa-miR-122	176807	1
hsa-miR-122	109800	2
hsa-miR-122	155720	3
hsa-miR-122	114480	4
hsa-miR-122	114500	5
hsa-miR-122	174050	6
hsa-miR-122	603956	7
hsa-miR-122	256700	8
hsa-miR-122	180200	9
hsa-miR-122	607174	10
hsa-miR-122	150699	11
hsa-miR-122	104300	12
hsa-miR-122	188470	13
hsa-miR-122	211980	14
hsa-miR-122	145500	15
hsa-miR-122	300376	16
hsa-miR-122	608232	17
hsa-miR-122	601400	18
hsa-miR-122	155255	19
hsa-miR-122	202300	20
hsa-miR-125a-5p	153600	1
hsa-miR-125a-5p	151400	2
hsa-miR-125a-5p	114480	3
hsa-miR-125a-5p	236000	4
hsa-miR-125a-5p	180200	5
hsa-miR-125a-5p	155720	6
hsa-miR-125a-5p	601400	7
hsa-miR-125a-5p	114500	8
hsa-miR-125a-5p	608232	9
hsa-miR-125a-5p	256700	10
hsa-miR-125a-5p	156240	11
hsa-miR-125a-5p	600807	12
hsa-miR-125a-5p	178600	13
hsa-miR-125a-5p	104300	14
hsa-miR-125a-5p	161550	15
hsa-miR-125a-5p	155255	16
hsa-miR-125a-5p	159552	17
hsa-miR-125a-5p	114550	18
hsa-miR-125a-5p	601626	19
hsa-miR-125a-5p	176807	20
hsa-miR-122a	176807	1
hsa-miR-122a	155720	2
hsa-miR-122a	256700	3
hsa-miR-122a	180200	4
hsa-miR-122a	211980	5
hsa-miR-122a	114500	6
hsa-miR-122a	600807	7
hsa-miR-122a	145500	8
hsa-miR-122a	607174	9
hsa-miR-122a	188470	10
hsa-miR-122a	104300	11
hsa-miR-122a	608232	12
hsa-miR-122a	174050	13
hsa-miR-122a	109800	14
hsa-miR-122a	236000	15
hsa-miR-122a	158350	16
hsa-miR-122a	153600	17
hsa-miR-122a	155255	18
hsa-miR-122a	133239	19
hsa-miR-122a	143100	20
hsa-miR-126	155720	1
hsa-miR-126	180200	2
hsa-miR-126	603956	3
hsa-miR-126	256700	4
hsa-miR-126	158350	5
hsa-miR-126	608232	6
hsa-miR-126	109800	7
hsa-miR-126	601400	8
hsa-miR-126	607174	9
hsa-miR-126	155255	10
hsa-miR-126	188470	11
hsa-miR-126	236000	12
hsa-miR-126	151400	13
hsa-miR-126	104300	14
hsa-miR-126	150699	15
hsa-miR-126	133239	16
hsa-miR-126	153600	17
hsa-miR-126	174050	18
hsa-miR-126	159552	19
hsa-miR-126	202300	20
hsa-miR-126*	114480	1
hsa-miR-126*	155720	2
hsa-miR-126*	608232	3
hsa-miR-126*	114500	4
hsa-miR-126*	180200	5
hsa-miR-126*	601400	6
hsa-miR-126*	236000	7
hsa-miR-126*	256700	8
hsa-miR-126*	188470	9
hsa-miR-126*	607174	10
hsa-miR-126*	151400	11
hsa-miR-126*	604370	12
hsa-miR-126*	158350	13
hsa-miR-126*	155255	14
hsa-miR-126*	109800	15
hsa-miR-126*	247640	16
hsa-miR-126*	153600	17
hsa-miR-126*	104300	18
hsa-miR-126*	202300	19
hsa-miR-126*	600807	20
hsa-miR-128	600274	1
hsa-miR-128	114480	2
hsa-miR-128	156240	3
hsa-miR-128	601665	4
hsa-miR-128	174050	5
hsa-miR-128	180200	6
hsa-miR-128	145500	7
hsa-miR-128	143100	8
hsa-miR-128	600807	9
hsa-miR-128	254500	10
hsa-miR-128	104300	11
hsa-miR-128	310200	12
hsa-miR-128	126200	13
hsa-miR-128	209850	14
hsa-miR-128	155720	15
hsa-miR-128	607174	16
hsa-miR-128	114500	17
hsa-miR-128	158350	18
hsa-miR-128	190685	19
hsa-miR-128	300100	20
hsa-miR-130a	180200	1
hsa-miR-130a	114480	2
hsa-miR-130a	608232	3
hsa-miR-130a	155720	4
hsa-miR-130a	300376	5
hsa-miR-130a	153600	6
hsa-miR-130a	151400	7
hsa-miR-130a	256700	8
hsa-miR-130a	104300	9
hsa-miR-130a	176807	10
hsa-miR-130a	158350	11
hsa-miR-130a	236000	12
hsa-miR-130a	143100	13
hsa-miR-130a	607174	14
hsa-miR-130a	114500	15
hsa-miR-130a	300100	16
hsa-miR-130a	254500	17
hsa-miR-130a	159552	18
hsa-miR-130a	190685	19
hsa-miR-130a	155255	20
hsa-miR-135a	153600	1
hsa-miR-135a	113970	2
hsa-miR-135a	608232	3
hsa-miR-135a	254500	4
hsa-miR-135a	159552	5
hsa-miR-135a	151400	6
hsa-miR-135a	247640	7
hsa-miR-135a	178600	8
hsa-miR-135a	601626	9
hsa-miR-135a	600807	10
hsa-miR-135a	601400	11
hsa-miR-135a	114480	12
hsa-miR-135a	155720	13
hsa-miR-135a	211980	14
hsa-miR-135a	131440	15
hsa-miR-135a	104300	16
hsa-miR-135a	126200	17
hsa-miR-135a	180200	18
hsa-miR-135a	114550	19
hsa-miR-135a	256700	20
hsa-miR-139	114480	1
hsa-miR-139	155720	2
hsa-miR-139	180200	3
hsa-miR-139	256700	4
hsa-miR-139	109800	5
hsa-miR-139	603956	6
hsa-miR-139	176807	7
hsa-miR-139	607174	8
hsa-miR-139	158350	9
hsa-miR-139	133239	10
hsa-miR-139	155255	11
hsa-miR-139	188470	12
hsa-miR-139	601400	13
hsa-miR-139	604370	14
hsa-miR-139	156240	15
hsa-miR-139	202300	16
hsa-miR-139	310200	17
hsa-miR-139	608232	18
hsa-miR-139	600807	19
hsa-miR-139	174050	20
hsa-miR-141	155720	1
hsa-miR-141	180200	2
hsa-miR-141	603956	3
hsa-miR-141	256700	4
hsa-miR-141	109800	5
hsa-miR-141	158350	6
hsa-miR-141	607174	7
hsa-miR-141	155255	8
hsa-miR-141	188470	9
hsa-miR-141	133239	10
hsa-miR-141	150699	11
hsa-miR-141	608232	12
hsa-miR-141	202300	13
hsa-miR-141	174050	14
hsa-miR-141	300228	15
hsa-miR-141	236000	16
hsa-miR-141	600807	17
hsa-miR-141	153600	18
hsa-miR-141	145500	19
hsa-miR-141	104300	20
hsa-miR-200c	176807	1
hsa-miR-200c	180200	2
hsa-miR-200c	603956	3
hsa-miR-200c	155720	4
hsa-miR-200c	256700	5
hsa-miR-200c	114550	6
hsa-miR-200c	158350	7
hsa-miR-200c	607174	8
hsa-miR-200c	155255	9
hsa-miR-200c	109800	10
hsa-miR-200c	133239	11
hsa-miR-200c	202300	12
hsa-miR-200c	156240	13
hsa-miR-200c	188470	14
hsa-miR-200c	608232	15
hsa-miR-200c	150699	16
hsa-miR-200c	601400	17
hsa-miR-200c	604183	18
hsa-miR-200c	310200	19
hsa-miR-200c	236000	20
hsa-miR-429	155720	1
hsa-miR-429	176807	2
hsa-miR-429	114500	3
hsa-miR-429	180200	4
hsa-miR-429	256700	5
hsa-miR-429	156240	6
hsa-miR-429	601400	7
hsa-miR-429	114550	8
hsa-miR-429	158350	9
hsa-miR-429	607174	10
hsa-miR-429	236000	11
hsa-miR-429	153600	12
hsa-miR-429	155255	13
hsa-miR-429	608232	14
hsa-miR-429	178600	15
hsa-miR-429	188470	16
hsa-miR-429	600807	17
hsa-miR-429	247640	18
hsa-miR-429	202300	19
hsa-miR-429	143100	20
hsa-miR-140	114480	1
hsa-miR-140	176807	2
hsa-miR-140	180200	3
hsa-miR-140	155720	4
hsa-miR-140	114550	5
hsa-miR-140	153600	6
hsa-miR-140	603956	7
hsa-miR-140	155255	8
hsa-miR-140	256700	9
hsa-miR-140	158350	10
hsa-miR-140	607174	11
hsa-miR-140	608232	12
hsa-miR-140	133239	13
hsa-miR-140	109800	14
hsa-miR-140	188470	15
hsa-miR-140	601400	16
hsa-miR-140	202300	17
hsa-miR-140	151400	18
hsa-miR-140	310200	19
hsa-miR-140	104300	20
hsa-miR-16	114480	1
hsa-miR-16	153600	2
hsa-miR-16	608232	3
hsa-miR-16	155720	4
hsa-miR-16	254500	5
hsa-miR-16	114500	6
hsa-miR-16	180200	7
hsa-miR-16	601400	8
hsa-miR-16	256700	9
hsa-miR-16	159552	10
hsa-miR-16	113970	11
hsa-miR-16	600807	12
hsa-miR-16	188470	13
hsa-miR-16	601626	14
hsa-miR-16	158350	15
hsa-miR-16	607174	16
hsa-miR-16	104300	17
hsa-miR-16	604370	18
hsa-miR-16	178600	19
hsa-miR-16	109800	20
hsa-miR-100	603956	1
hsa-miR-100	114500	2
hsa-miR-100	114480	3
hsa-miR-100	114550	4
hsa-miR-100	158350	5
hsa-miR-100	188470	6
hsa-miR-100	180200	7
hsa-miR-100	607174	8
hsa-miR-100	150699	9
hsa-miR-100	155720	10
hsa-miR-100	256700	11
hsa-miR-100	202300	12
hsa-miR-100	300228	13
hsa-miR-100	155255	14
hsa-miR-100	211980	15
hsa-miR-100	133239	16
hsa-miR-100	151400	17
hsa-miR-100	601400	18
hsa-miR-100	174050	19
hsa-miR-100	254500	20
hsa-miR-1	145500	1
hsa-miR-1	114480	2
hsa-miR-1	155720	3
hsa-miR-1	256700	4
hsa-miR-1	180200	5
hsa-miR-1	104300	6
hsa-miR-1	155255	7
hsa-miR-1	178600	8
hsa-miR-1	300100	9
hsa-miR-1	176807	10
hsa-miR-1	188470	11
hsa-miR-1	153600	12
hsa-miR-1	310200	13
hsa-miR-1	607174	14
hsa-miR-1	158350	15
hsa-miR-1	190685	16
hsa-miR-1	174050	17
hsa-miR-1	236000	18
hsa-miR-1	109800	19
hsa-miR-1	143100	20
hsa-miR-143	180200	1
hsa-miR-143	256700	2
hsa-miR-143	607174	3
hsa-miR-143	158350	4
hsa-miR-143	608232	5
hsa-miR-143	155255	6
hsa-miR-143	150699	7
hsa-miR-143	188470	8
hsa-miR-143	236000	9
hsa-miR-143	601400	10
hsa-miR-143	174050	11
hsa-miR-143	133239	12
hsa-miR-143	153600	13
hsa-miR-143	202300	14
hsa-miR-143	104300	15
hsa-miR-143	254500	16
hsa-miR-143	300228	17
hsa-miR-143	310200	18
hsa-miR-143	145500	19
hsa-miR-143	600807	20
hsa-miR-31	155720	1
hsa-miR-31	256700	2
hsa-miR-31	180200	3
hsa-miR-31	603956	4
hsa-miR-31	607174	5
hsa-miR-31	188470	6
hsa-miR-31	158350	7
hsa-miR-31	155255	8
hsa-miR-31	133239	9
hsa-miR-31	604370	10
hsa-miR-31	202300	11
hsa-miR-31	608232	12
hsa-miR-31	600807	13
hsa-miR-31	145500	14
hsa-miR-31	236000	15
hsa-miR-31	150699	16
hsa-miR-31	153600	17
hsa-miR-31	104300	18
hsa-miR-31	174050	19
hsa-miR-31	300228	20
hsa-miR-377	114500	1
hsa-miR-377	114480	2
hsa-miR-377	114550	3
hsa-miR-377	176807	4
hsa-miR-377	603956	5
hsa-miR-377	180200	6
hsa-miR-377	155720	7
hsa-miR-377	109800	8
hsa-miR-377	256700	9
hsa-miR-377	145500	10
hsa-miR-377	158350	11
hsa-miR-377	607174	12
hsa-miR-377	300228	13
hsa-miR-377	202300	14
hsa-miR-377	151400	15
hsa-miR-377	310200	16
hsa-miR-377	104300	17
hsa-miR-377	608232	18
hsa-miR-377	608320	19
hsa-miR-377	188470	20
hsa-miR-200a	176807	1
hsa-miR-200a	114500	2
hsa-miR-200a	155720	3
hsa-miR-200a	180200	4
hsa-miR-200a	256700	5
hsa-miR-200a	153600	6
hsa-miR-200a	603956	7
hsa-miR-200a	158350	8
hsa-miR-200a	155255	9
hsa-miR-200a	109800	10
hsa-miR-200a	608232	11
hsa-miR-200a	188470	12
hsa-miR-200a	174050	13
hsa-miR-200a	151400	14
hsa-miR-200a	600807	15
hsa-miR-200a	133239	16
hsa-miR-200a	156240	17
hsa-miR-200a	104300	18
hsa-miR-200a	254500	19
hsa-miR-200a	159552	20
hsa-miR-200b	176807	1
hsa-miR-200b	114500	2
hsa-miR-200b	603956	3
hsa-miR-200b	180200	4
hsa-miR-200b	155720	5
hsa-miR-200b	256700	6
hsa-miR-200b	158350	7
hsa-miR-200b	109800	8
hsa-miR-200b	607174	9
hsa-miR-200b	155255	10
hsa-miR-200b	601400	11
hsa-miR-200b	150699	12
hsa-miR-200b	188470	13
hsa-miR-200b	174050	14
hsa-miR-200b	608232	15
hsa-miR-200b	202300	16
hsa-miR-200b	156240	17
hsa-miR-200b	133239	18
hsa-miR-200b	300228	19
hsa-miR-200b	236000	20
hsa-miR-17-3p	114480	1
hsa-miR-17-3p	155720	2
hsa-miR-17-3p	114500	3
hsa-miR-17-3p	180200	4
hsa-miR-17-3p	256700	5
hsa-miR-17-3p	109800	6
hsa-miR-17-3p	188470	7
hsa-miR-17-3p	601400	8
hsa-miR-17-3p	607174	9
hsa-miR-17-3p	603956	10
hsa-miR-17-3p	158350	11
hsa-miR-17-3p	202300	12
hsa-miR-17-3p	155255	13
hsa-miR-17-3p	156240	14
hsa-miR-17-3p	604370	15
hsa-miR-17-3p	608232	16
hsa-miR-17-3p	236000	17
hsa-miR-17-3p	300228	18
hsa-miR-17-3p	600807	19
hsa-miR-17-3p	133239	20
hsa-miR-34a	114480	1
hsa-miR-34a	143100	2
hsa-miR-34a	300100	3
hsa-miR-34a	158350	4
hsa-miR-34a	155720	5
hsa-miR-34a	607174	6
hsa-miR-34a	300376	7
hsa-miR-34a	190685	8
hsa-miR-34a	608232	9
hsa-miR-34a	181500	10
hsa-miR-34a	145500	11
hsa-miR-34a	603956	12
hsa-miR-34a	109800	13
hsa-miR-34a	254500	14
hsa-miR-34a	174050	15
hsa-miR-34a	164400	16
hsa-miR-34a	126200	17
hsa-miR-34a	209850	18
hsa-miR-34a	604370	19
hsa-miR-34a	600274	20
hsa-miR-520a	153600	1
hsa-miR-520a	113970	2
hsa-miR-520a	608232	3
hsa-miR-520a	254500	4
hsa-miR-520a	159552	5
hsa-miR-520a	151400	6
hsa-miR-520a	247640	7
hsa-miR-520a	178600	8
hsa-miR-520a	601626	9
hsa-miR-520a	600807	10
hsa-miR-520a	601400	11
hsa-miR-520a	114480	12
hsa-miR-520a	155720	13
hsa-miR-520a	211980	14
hsa-miR-520a	131440	15
hsa-miR-520a	104300	16
hsa-miR-520a	126200	17
hsa-miR-520a	180200	18
hsa-miR-520a	114550	19
hsa-miR-520a	256700	20
hsa-miR-614	153600	1
hsa-miR-614	113970	2
hsa-miR-614	608232	3
hsa-miR-614	254500	4
hsa-miR-614	159552	5
hsa-miR-614	151400	6
hsa-miR-614	247640	7
hsa-miR-614	178600	8
hsa-miR-614	601626	9
hsa-miR-614	600807	10
hsa-miR-614	601400	11
hsa-miR-614	114480	12
hsa-miR-614	155720	13
hsa-miR-614	211980	14
hsa-miR-614	131440	15
hsa-miR-614	104300	16
hsa-miR-614	126200	17
hsa-miR-614	180200	18
hsa-miR-614	114550	19
hsa-miR-614	256700	20
hsa-miR-155	608232	1
hsa-miR-155	180200	2
hsa-miR-155	159552	3
hsa-miR-155	254500	4
hsa-miR-155	104300	5
hsa-miR-155	155720	6
hsa-miR-155	256700	7
hsa-miR-155	176807	8
hsa-miR-155	143100	9
hsa-miR-155	158350	10
hsa-miR-155	600807	11
hsa-miR-155	300100	12
hsa-miR-155	126200	13
hsa-miR-155	607174	14
hsa-miR-155	181500	15
hsa-miR-155	155255	16
hsa-miR-155	178600	17
hsa-miR-155	188470	18
hsa-miR-155	300376	19
hsa-miR-155	174050	20
hsa-miR-186	153600	1
hsa-miR-186	608232	2
hsa-miR-186	600807	3
hsa-miR-186	155720	4
hsa-miR-186	159552	5
hsa-miR-186	256700	6
hsa-miR-186	104300	7
hsa-miR-186	254500	8
hsa-miR-186	114480	9
hsa-miR-186	180200	10
hsa-miR-186	113970	11
hsa-miR-186	151400	12
hsa-miR-186	176807	13
hsa-miR-186	211980	14
hsa-miR-186	181500	15
hsa-miR-186	300100	16
hsa-miR-186	114500	17
hsa-miR-186	145500	18
hsa-miR-186	188470	19
hsa-miR-186	143100	20
hsa-miR-18a	180200	1
hsa-miR-18a	155720	2
hsa-miR-18a	256700	3
hsa-miR-18a	176807	4
hsa-miR-18a	153600	5
hsa-miR-18a	133239	6
hsa-miR-18a	607174	7
hsa-miR-18a	608232	8
hsa-miR-18a	601400	9
hsa-miR-18a	158350	10
hsa-miR-18a	109800	11
hsa-miR-18a	603956	12
hsa-miR-18a	188470	13
hsa-miR-18a	604370	14
hsa-miR-18a	156240	15
hsa-miR-18a	104300	16
hsa-miR-18a	254500	17
hsa-miR-18a	202300	18
hsa-miR-18a	600807	19
hsa-miR-18a	151400	20
hsa-miR-196a	155255	1
hsa-miR-196a	153600	2
hsa-miR-196a	180200	3
hsa-miR-196a	211980	4
hsa-miR-196a	176807	5
hsa-miR-196a	155720	6
hsa-miR-196a	256700	7
hsa-miR-196a	608232	8
hsa-miR-196a	601400	9
hsa-miR-196a	603956	10
hsa-miR-196a	158350	11
hsa-miR-196a	114550	12
hsa-miR-196a	604370	13
hsa-miR-196a	188470	14
hsa-miR-196a	109800	15
hsa-miR-196a	254500	16
hsa-miR-196a	607174	17
hsa-miR-196a	604183	18
hsa-miR-196a	202300	19
hsa-miR-196a	113970	20
hsa-miR-30a-5p	114480	1
hsa-miR-30a-5p	180200	2
hsa-miR-30a-5p	153600	3
hsa-miR-30a-5p	155720	4
hsa-miR-30a-5p	256700	5
hsa-miR-30a-5p	114550	6
hsa-miR-30a-5p	608232	7
hsa-miR-30a-5p	104300	8
hsa-miR-30a-5p	158350	9
hsa-miR-30a-5p	601400	10
hsa-miR-30a-5p	143100	11
hsa-miR-30a-5p	607174	12
hsa-miR-30a-5p	300100	13
hsa-miR-30a-5p	155255	14
hsa-miR-30a-5p	190685	15
hsa-miR-30a-5p	254500	16
hsa-miR-30a-5p	188470	17
hsa-miR-30a-5p	600807	18
hsa-miR-30a-5p	151400	19
hsa-miR-30a-5p	145500	20
hsa-miR-30b	153600	1
hsa-miR-30b	114480	2
hsa-miR-30b	180200	3
hsa-miR-30b	104300	4
hsa-miR-30b	256700	5
hsa-miR-30b	155720	6
hsa-miR-30b	608232	7
hsa-miR-30b	143100	8
hsa-miR-30b	300100	9
hsa-miR-30b	114550	10
hsa-miR-30b	190685	11
hsa-miR-30b	159552	12
hsa-miR-30b	600807	13
hsa-miR-30b	254500	14
hsa-miR-30b	145500	15
hsa-miR-30b	114500	16
hsa-miR-30b	158350	17
hsa-miR-30b	126200	18
hsa-miR-30b	113970	19
hsa-miR-30b	151400	20
hsa-miR-374	153600	1
hsa-miR-374	608232	2
hsa-miR-374	159552	3
hsa-miR-374	176807	4
hsa-miR-374	151400	5
hsa-miR-374	113970	6
hsa-miR-374	114480	7
hsa-miR-374	155720	8
hsa-miR-374	114500	9
hsa-miR-374	180200	10
hsa-miR-374	254500	11
hsa-miR-374	104300	12
hsa-miR-374	211980	13
hsa-miR-374	247640	14
hsa-miR-374	600807	15
hsa-miR-374	188470	16
hsa-miR-374	256700	17
hsa-miR-374	155255	18
hsa-miR-374	133239	19
hsa-miR-374	603956	20
hsa-miR-192	155255	1
hsa-miR-192	188470	2
hsa-miR-192	114480	3
hsa-miR-192	202300	4
hsa-miR-192	180200	5
hsa-miR-192	601400	6
hsa-miR-192	114550	7
hsa-miR-192	603956	8
hsa-miR-192	176807	9
hsa-miR-192	151400	10
hsa-miR-192	109800	11
hsa-miR-192	604183	12
hsa-miR-192	256700	13
hsa-miR-192	155720	14
hsa-miR-192	158350	15
hsa-miR-192	604370	16
hsa-miR-192	254500	17
hsa-miR-192	156240	18
hsa-miR-192	607174	19
hsa-miR-192	236000	20
hsa-miR-194	603956	1
hsa-miR-194	155255	2
hsa-miR-194	176807	3
hsa-miR-194	180200	4
hsa-miR-194	109800	5
hsa-miR-194	114480	6
hsa-miR-194	604370	7
hsa-miR-194	256700	8
hsa-miR-194	158350	9
hsa-miR-194	211980	10
hsa-miR-194	188470	11
hsa-miR-194	155720	12
hsa-miR-194	150699	13
hsa-miR-194	607174	14
hsa-miR-194	601400	15
hsa-miR-194	174050	16
hsa-miR-194	202300	17
hsa-miR-194	604183	18
hsa-miR-194	300100	19
hsa-miR-194	310200	20
hsa-miR-26a	608232	1
hsa-miR-26a	180200	2
hsa-miR-26a	155720	3
hsa-miR-26a	603956	4
hsa-miR-26a	256700	5
hsa-miR-26a	607174	6
hsa-miR-26a	158350	7
hsa-miR-26a	236000	8
hsa-miR-26a	153600	9
hsa-miR-26a	159552	10
hsa-miR-26a	151400	11
hsa-miR-26a	155255	12
hsa-miR-26a	104300	13
hsa-miR-26a	211980	14
hsa-miR-26a	188470	15
hsa-miR-26a	601400	16
hsa-miR-26a	254500	17
hsa-miR-26a	133239	18
hsa-miR-26a	150699	19
hsa-miR-26a	202300	20
hsa-miR-26b	114480	1
hsa-miR-26b	114500	2
hsa-miR-26b	603956	3
hsa-miR-26b	180200	4
hsa-miR-26b	155720	5
hsa-miR-26b	256700	6
hsa-miR-26b	607174	7
hsa-miR-26b	158350	8
hsa-miR-26b	143100	9
hsa-miR-26b	190685	10
hsa-miR-26b	155255	11
hsa-miR-26b	608232	12
hsa-miR-26b	174050	13
hsa-miR-26b	188470	14
hsa-miR-26b	300100	15
hsa-miR-26b	145500	16
hsa-miR-26b	601400	17
hsa-miR-26b	310200	18
hsa-miR-26b	126200	19
hsa-miR-26b	236000	20
hsa-let-7a	608232	1
hsa-let-7a	153600	2
hsa-let-7a	155720	3
hsa-let-7a	180200	4
hsa-let-7a	159552	5
hsa-let-7a	254500	6
hsa-let-7a	158350	7
hsa-let-7a	256700	8
hsa-let-7a	601400	9
hsa-let-7a	607174	10
hsa-let-7a	155255	11
hsa-let-7a	603956	12
hsa-let-7a	104300	13
hsa-let-7a	188470	14
hsa-let-7a	109800	15
hsa-let-7a	600807	16
hsa-let-7a	126200	17
hsa-let-7a	156240	18
hsa-let-7a	178600	19
hsa-let-7a	202300	20
hsa-miR-106b	180200	1
hsa-miR-106b	608232	2
hsa-miR-106b	300100	3
hsa-miR-106b	143100	4
hsa-miR-106b	114480	5
hsa-miR-106b	153600	6
hsa-miR-106b	190685	7
hsa-miR-106b	310200	8
hsa-miR-106b	256700	9
hsa-miR-106b	145500	10
hsa-miR-106b	155720	11
hsa-miR-106b	126200	12
hsa-miR-106b	607174	13
hsa-miR-106b	158350	14
hsa-miR-106b	236000	15
hsa-miR-106b	159552	16
hsa-miR-106b	300376	17
hsa-miR-106b	600807	18
hsa-miR-106b	601400	19
hsa-miR-106b	155255	20
hsa-miR-130b	608232	1
hsa-miR-130b	159552	2
hsa-miR-130b	153600	3
hsa-miR-130b	151400	4
hsa-miR-130b	236000	5
hsa-miR-130b	155720	6
hsa-miR-130b	114480	7
hsa-miR-130b	180200	8
hsa-miR-130b	607174	9
hsa-miR-130b	604370	10
hsa-miR-130b	211980	11
hsa-miR-130b	158350	12
hsa-miR-130b	176807	13
hsa-miR-130b	155255	14
hsa-miR-130b	131440	15
hsa-miR-130b	113970	16
hsa-miR-130b	256700	17
hsa-miR-130b	254500	18
hsa-miR-130b	104300	19
hsa-miR-130b	156240	20
hsa-miR-181b	608232	1
hsa-miR-181b	153600	2
hsa-miR-181b	180200	3
hsa-miR-181b	159552	4
hsa-miR-181b	236000	5
hsa-miR-181b	155720	6
hsa-miR-181b	158350	7
hsa-miR-181b	256700	8
hsa-miR-181b	211980	9
hsa-miR-181b	604370	10
hsa-miR-181b	607174	11
hsa-miR-181b	247640	12
hsa-miR-181b	104300	13
hsa-miR-181b	113970	14
hsa-miR-181b	114550	15
hsa-miR-181b	601400	16
hsa-miR-181b	600807	17
hsa-miR-181b	155255	18
hsa-miR-181b	126200	19
hsa-miR-181b	603956	20
hsa-miR-20b	104300	1
hsa-miR-20b	300100	2
hsa-miR-20b	143100	3
hsa-miR-20b	190685	4
hsa-miR-20b	600274	5
hsa-miR-20b	164400	6
hsa-miR-20b	168600	7
hsa-miR-20b	310200	8
hsa-miR-20b	180200	9
hsa-miR-20b	209850	10
hsa-miR-20b	256700	11
hsa-miR-20b	153600	12
hsa-miR-20b	268000	13
hsa-miR-20b	145500	14
hsa-miR-20b	608232	15
hsa-miR-20b	155720	16
hsa-miR-20b	600807	17
hsa-miR-20b	254500	18
hsa-miR-20b	159552	19
hsa-miR-20b	300376	20
hsa-miR-1275	300100	1
hsa-miR-1275	104300	2
hsa-miR-1275	164400	3
hsa-miR-1275	143100	4
hsa-miR-1275	256700	5
hsa-miR-1275	600807	6
hsa-miR-1275	310200	7
hsa-miR-1275	254500	8
hsa-miR-1275	153600	9
hsa-miR-1275	268000	10
hsa-miR-1275	181500	11
hsa-miR-1275	180200	12
hsa-miR-1275	159552	13
hsa-miR-1275	608232	14
hsa-miR-1275	155720	15
hsa-miR-1275	600274	16
hsa-miR-1275	190685	17
hsa-miR-1275	151400	18
hsa-miR-1275	236000	19
hsa-miR-1275	145500	20
hsa-miR-142-3p	176807	1
hsa-miR-142-3p	256700	2
hsa-miR-142-3p	114500	3
hsa-miR-142-3p	155720	4
hsa-miR-142-3p	114480	5
hsa-miR-142-3p	180200	6
hsa-miR-142-3p	300100	7
hsa-miR-142-3p	174050	8
hsa-miR-142-3p	603956	9
hsa-miR-142-3p	607174	10
hsa-miR-142-3p	600807	11
hsa-miR-142-3p	211980	12
hsa-miR-142-3p	188470	13
hsa-miR-142-3p	145500	14
hsa-miR-142-3p	158350	15
hsa-miR-142-3p	104300	16
hsa-miR-142-3p	143100	17
hsa-miR-142-3p	310200	18
hsa-miR-142-3p	109800	19
[truncated: 5,301 more rows]
